# Supplementary material
Source: publisher figshare collection journal article supplement (https://gsajournals.figshare.com/ndownloader/files/21002478)
Supplement: Supplementary file 1 [file 21002478]

**Table S1.** List of candidate genes identified by TWAS for ADHD, ASD and cervical cancer (*P value*<0.0001).

| **Disorder** | **Gene** | **Chromosome** | **ZTWAS** | **PTWAS** |
| --- | --- | --- | --- | --- |
| **ADHD** | ELOVL1 | 1 | 5.6482 | <0.0001 |
| TIE1 | 1 | 5.2778 | <0.0001 |
| MED8 | 1 | -5.1419 | <0.0001 |
| RPLP2 | 11 | -4.8369 | <0.0001 |
| PIDD | 11 | 4.7070 | <0.0001 |
| PNPLA2 | 11 | -4.7038 | <0.0001 |
| CDHR5 | 11 | -4.6132 | <0.0001 |
| RMI1 | 9 | -4.5551 | <0.0001 |
| CCDC24 | 1 | 4.5541 | <0.0001 |
| PDDC1 | 11 | 4.5515 | <0.0001 |
| AP4E1 | 15 | 4.5386 | <0.0001 |
| SLC25A22 | 11 | 4.4910 | <0.0001 |
| PNPLA2 | 11 | -4.4133 | <0.0001 |
| RIT2 | 18 | 4.4076 | <0.0001 |
| SMAP1 | 6 | 4.3975 | <0.0001 |
| KIF27 | 9 | 4.3919 | <0.0001 |
| MANBA | 4 | -4.3005 | <0.0001 |
| GKAP1 | 9 | 4.2989 | <0.0001 |
| CISD2 | 4 | -4.2581 | <0.0001 |
| HYAL3 | 3 | -4.1765 | <0.0001 |
| MEF2C | 5 | 4.1448 | <0.0001 |
| RMI1 | 9 | 4.1006 | <0.0001 |
| ST3GAL3 | 1 | -4.0748 | <0.0001 |
| VSIG10 | 12 | -4.0606 | <0.0001 |
| **ASD** | NAPB | 20 | 4.1450 | <0.0001 |
| **Cervical**  **cancer** | ORMDL3 | 17 | -4.8530 | <0.0001 |
| GSDMB | 17 | -4.7905 | <0.0001 |
| NSUN6 | 10 | -4.3395 | <0.0001 |
| LOC654433 | 2 | 4.1357 | <0.0001 |
| PGAP3 | 17 | -4.0840 | <0.0001 |

Note: attention deficiency/hyperactive disorder, ADHD; autism spectrum disorder, ASD.
